# Supplementary material
Source: HighWire-hosted journal article supplement (http://www.ajnr.org/highwire/filestream/52152/field_highwire_adjunct_files/0/1278_table.pdf)
Supplement: 1278_table.pdf [file 1278_table.pdf]

**On-line Table: Clinical, vascular, and DWI data and outcome**

| Patient No./<br>Sex | Age<br>(yr) | NIHSS<br>Score | Length of Coma<br>(hr) | Occlusion<br>Level* | Time to Treatment<br>(hr) | BA TIMI<br>Score | BS DWI<br>Score | Cerebellar<br>Damage | Outcome<br>(mRS) |
|---------------------|-------------|----------------|------------------------|---------------------|---------------------------|------------------|-----------------|----------------------|------------------|
| 1/F                 | 42          | 6              | 0                      | 1                   | 4.7                       | 3                | 0               | Minor                | 1                |
| 2/F                 | 72          | 20             | 0                      | 1                   | 7.4                       | 2                | 4               | Minor                | 6                |
| 3/F                 | 71          | 20             | 0                      | 1                   | 6.9                       | 0                | 0               | 0                    | 6                |
| 4/M                 | 60          | 5              | 0                      | 1                   | 26.6                      | 2                | 0               | 0                    | 6                |
| 5/F                 | 75          | 16             | 0                      | 1                   | 13                        | 3                | 2               | 0                    | 2                |
| 6/F                 | 31          | 6              | 0                      | 2                   | 7.5                       | 3                | 1               | 0                    | 1                |
| 7/M                 | 77          | 34             | 3.2                    | 1                   | 4.9                       | 0                | 3               | Major                | 6                |
| 8/F                 | 31          | 4              | 0                      | 1                   | 7.7                       | 3                | 0               | Minor                | 1                |
| 9/M                 | 61          | 21             | 0                      | 3                   | 7.5                       | 3                | 4               | Minor                | 1                |
| 10/F                | 45          | 22             | 0                      | 2                   | 7.2                       | 3                | 9               | 0                    | 3                |
| 11/F                | 70          | 19             | 0                      | 3                   | 13.5                      | 3                | 1               | Minor                | 2                |
| 12/F                | 42          | 24             | 18.0                   | 1                   | 8.7                       | 1                | 12              | Major                | 6                |
| 13/F                | 26          | 33             | 2.0                    | 1                   | 11                        | 0                | 14              | Major                | 5                |
| 14/M                | 42          | 33             | 7.5                    | 1                   | 7.5                       | 2                | 7               | Major                | 6                |
| 15/M                | 37          | 32             | 12.3                   | 2                   | 15.3                      | 2                | 11              | Minor                | 6                |
| 16/M                | 63          | 22             | 0                      | 1                   | 4.7                       | 0                | 5               | 0                    | 5                |
| 17/M                | 65          | 15             | 0                      | 1                   | 10                        | 2                | 3               | Minor                | 4                |
| 18/M                | 62          | 15             | 0                      | 1                   | 16.9                      | 0                | 4               | Minor                | 6                |
| 19/M                | 64          | 33             | 6.6                    | 1                   | 6.6                       | 1                | 8               | Major                | 6                |
| 20/M                | 60          | 7              | 0                      | 3                   | 3.2                       | 3                | 0               | Minor                | 1                |
| 21/M                | 62          | 29             | 5.4                    | 3                   | 3.5                       | 2                | 0               | Minor                | 1                |
| 22/F                | 73          | 13             | 0                      | 1                   | 5.2                       | 3                | 4               | Major                | 6                |
| 23/M                | 62          | 31             | 7.5                    | 3                   | 8.5                       | 2                | 3               | 0                    | 3                |
| 24/M                | 56          | 28             | 3.0                    | 1                   | 14.8                      | 2                | 6               | Major                | 6                |
| 25/M                | 45          | 34             | 12.0                   | 1                   | 14.3                      | 2                | 10              | Major                | 5                |
| 26/F                | 72          | 5              | 0                      | 3                   | 4.7                       | 3                | 0               | Major                | 3                |
| 27/M                | 52          | 30             | 6.4                    | 2                   | 6.4                       | 2                | 2               | Major                | 6                |
| 28/F                | 50          | 32             | 5.7                    | 2                   | 5.7                       | 2                | 6               | Major                | 6                |
| 29/M                | 48          | 29             | 3.4                    | 1                   | 3.4                       | 2                | 2               | Major                | 6                |

**Note:**—BA TIMI score indicates basilar artery TIMI score; BS DWI score, brain stem DWI score; DWI, diffusion-weighted imaging; NIHSS, National Institutes of Health Stroke Scale; mRS, modified Rankin Score.

\* 1 indicates lower basilar; 2, mid basilar; 3, upper basilar occlusion.
